# Supplementary material for: Vapor plumes in a tropical wet forest: spotting the invisible evaporation
Source: Copernicus journal article supplement (doi:10.5194/hess-2020-14), 2020-01-23
Supplement: Supplementary file [file hess-2020-14-RC2-supplement.pdf]

## Comments to authors 2

### General comments 2

The manuscript is revised perfectly except for "Specific comments, 2)" that is needed additional modification and explanation.

I noticed additional typos and listed them in Technical corrections 2.

### Specific comments 2

2) Page 6, lines 4 to 8 of the original manuscript

As authors mentioned in their reply,  $\Psi_S$  is defined as mass of water vapor divided by mass of dry air. The numerator in the new equation (7) in the reply is not  $m_{liq.water}$  but  $m_{vap.liq}$  as shown below.

$$\Psi_S = \frac{m_{vap.water}}{m_{dry.air}} \quad (7)$$

The new equation (8) is rewritten as the equation (8').

$$\Psi_L = \frac{\rho_{LWC}}{\rho_{air}} \quad (8)$$

$$\Psi_L = \frac{m_{liq.water}}{m_{dry.air}} \quad (8')$$

The problem is how the value of  $\rho_{LWC}$  in the equation (8) or  $m_{liq.water}$  in (8') is estimated. Generally speaking, direct measurement of liquid water content (LWC) in the air is difficult and it seems that no instrument to measure LWC was installed at the site. I think authors used some estimated values. Please specify how  $\rho_{LWC}$  or  $m_{liq.water}$  was estimated.

### Technical corrections 2

18) Page 2, line 23

Please insert "being" between "techniques" and "able".

19) Page 7, line 20

Please add "with" between "2°C" and "respect".

20) Page 8, line 27

a lower density than air above -> the dew point temperature

21) Page 8, line 31

formation of -> they form

22) Page 10, line 7

is more easy to move upwards the parcels of air

-> it is easier for the air parcels to move upwards

23) Page 10, line 18

Spellman (2012) -> (Spellman, 2012)
